# Supplementary material for: The development of a reference corner cube inertial suspension device
Source: Copernicus journal article supplement (doi:10.5194/gi-2023-16), 2023-12-06
Supplement: Supplementary file [file gi-2023-16-AC2-supplement.pdf]

**Table1** Shaking table test results

| Frequency<br>(Hz) | Sensitivity<br>(V/m/s) |
|-------------------|------------------------|
| 5                 | 365.896                |
| 2                 | 290.619                |
| 1                 | 190.868                |
| 0.5               | 104.905                |
| 0.2               | 43.272                 |
| 0.1               | 15.721                 |

**Table2** Calibration frequency

| NO. | Cycle number (unit) | Frequency (Hz) | Attenuation factor |
|-----|---------------------|----------------|--------------------|
| 1   | 10                  | 1/30           | 1000               |
| 2   | 100                 | 0.05           | 1000               |
| 3   | 100                 | 0.1            | 1000               |
| 4   | 100                 | 0.2            | 1000               |
| 5   | 100                 | 0.25           | 1000               |
| 6   | 100                 | 1/3            | 1000               |
| 7   | 100                 | 0.5            | 1000               |
| 8   | 200                 | 1              | 1000               |
| 9   | 200                 | 2              | 1000               |
| 10  | 200                 | 3              | 1000               |
| 11  | 200                 | 4              | 1                  |
| 12  | 200                 | 5              | 1                  |
| 13  | 200                 | 6              | 1                  |
| 14  | 200                 | 7              | 1                  |
| 15  | 200                 | 8              | 1                  |
| 16  | 200                 | 9              | 1                  |
| 17  | 200                 | 10             | 1                  |

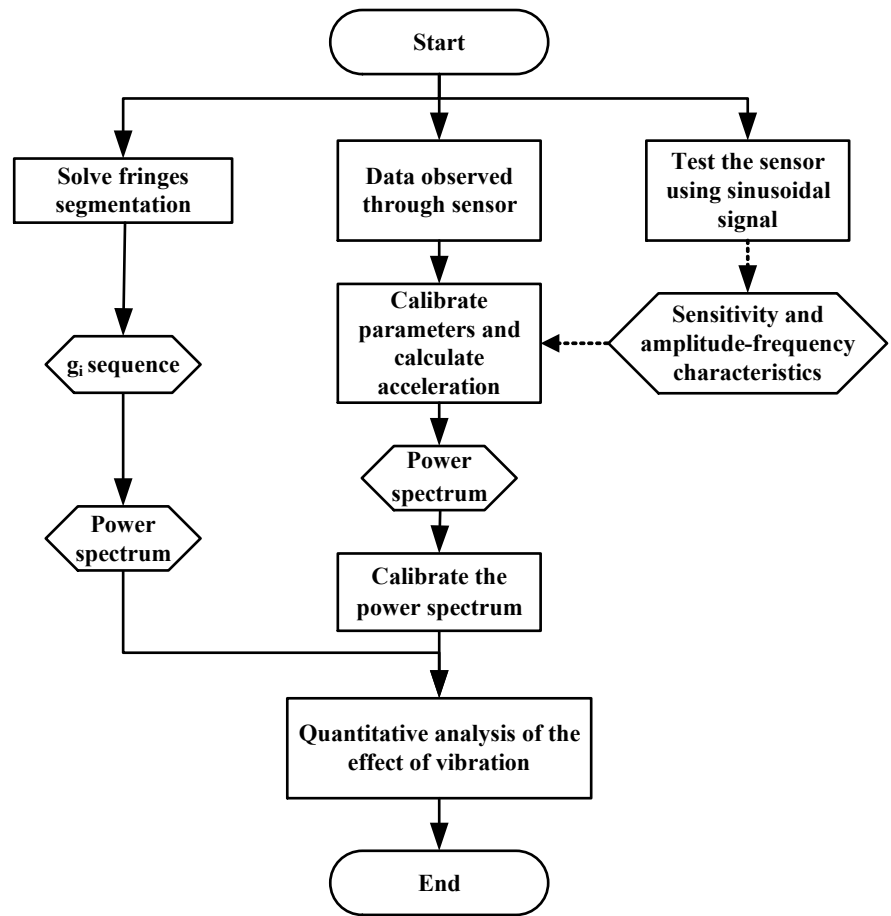

Figure 7. Data processing flow.
